# Supplementary material for: Antioxidants help favorably regulate the kinetics of lipid peroxidation, polyunsaturated fatty acids degradation and acidic cannabinoids decarboxylation in hempseed oil
Source: Sci Rep. 2020 Jun 29;10:10567. doi: 10.1038/s41598-020-67267-0 (PMC7324387; doi:10.1038/s41598-020-67267-0)
Supplement: Supplementary file 1 — Supplementary Information. [file 41598_2020_67267_MOESM1_ESM.docx]

**Supplemental documents**

**Supplemental Table 1:** Color changes (*ΔE**) calculated for HSO samples during 24 h storage at 40,55,70 and 85°C

| **Sample** | Temperature (°C) | **Color difference value (*ΔE**)** | | | | |
| --- | --- | --- | --- | --- | --- | --- |
| **2h** | **4h** | **8h** | **12h** | **24h** |
| **HSO** | 40 | 1.29a | 1.50a | 2.23ab | 3.69c | 3.98c |
| 55 | 1.35a | 2.15ab | 4.08c | 4.15c | 6.11d |
| 70 | 2.09a | 2.87ab | 6.25c | 6.99cd | 8.54e |
| 85 | 3.12a | 4.67b | 6.41c | 7.80d | 10.41e |
| **HSO+BHT** | 40 | 0.63a | 1.78bc | 2.86c | 3.96cd | 4.95d |
| 55 | 1.19a | 1.57a | 2.97ab | 4.02bc | 5.13c |
| 70 | 1.28a | 1.94ab | 3.56b | 5.08c | 5.52c |
| 85 | 1.24a | 2.45ab | 4.12bc | 5.28c | 5.86c |
| **HSO+T** | 40 | 0.78a | 1.50a | 2.34ab | 2.89b | 4.42c |
| 55 | 1.66a | 2.95ab | 3.86b | 4.39bc | 5.49c |
| 70 | 2.76a | 3.95ab | 4.69bc | 5.54c | 6.21d |
| 85 | 1.33a | 2.79ab | 4.58bc | 5.73c | 6.48d |
| **HSO+AP** | 40 | 0.83a | 1.76a | 2.98ab | 4.70bc | 4.95c |
| 55 | 1.07a | 1.88ab | 3.06bc | 4.53c | 5.09c |
| 70 | 1.93a | 3.55b | 4.64bc | 5.32c | 5.54c |
| 85 | 2.15a | 3.09ab | 5.01c | 5.47c | 6.31d |

Values represents means (n=3)

a-e In a row followed by the different small letters are significantly different by Turkey’s test (*p* < 0.05)

cd

bc

a

c

b

e

d

cd

g

f

f

i

i

ij

g

j

k

jk

h

l

lm

m

lm

d

Supplemental **Fig.** **1** Color changes (*ΔE**) of HSO samples (without/with antioxidant) during 15 days storage

at 25°C

a-m Bars depicited with different small letters are significantly different by Turkey’s test (*p* < 0.05)


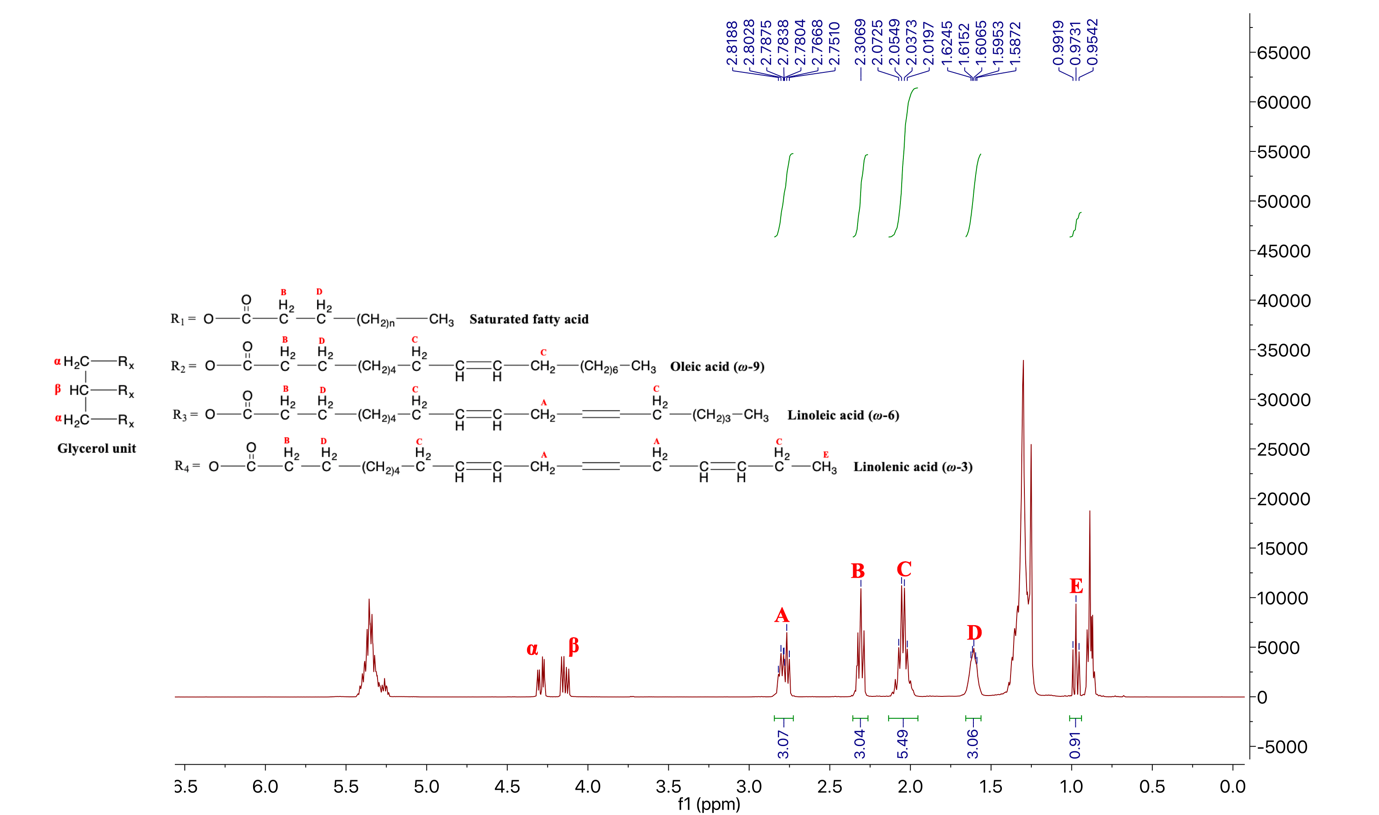


Supplemental **Fig. 2** 1H NMR spectrum of [hemp seed](https://www.sciencedirect.com/topics/biochemistry-genetics-and-molecular-biology/hemp-seed) oil (HSO) in CDCl3

**Supplemental Fig. 3** Decarboxylation of CBDA in HSO samples (without/with antioxidants) incubated at 85°C for 24h

List vof abbriviations:

ANOVA: Analysis of Variances

AOAC: Association of Official Analytical Chemists

AP: Ascorbyl palmitate

BHT: Butylated hydroxytoluene

CBD: Canabidiol

CBDA: Cannabidiolic acid

CBDV: Cannabidivarin

CBG: Cannabigerol

CDH: Conjugated diene hydroperoxides

CIE: International Commission on Illumination

Ea: Activation energies

ESI: Electrospray Ionization

GC-FID: Gas Chromatography with Flame Ionization Detector

GLA: Gamma linoleic acid

HPLC: High Performance Liquid Chromatography

HSO: Hempseed oil

LC-MS: Liquid chromatography–Mass Spectrometry

NMR: Nuclear Magnetic Resonance

*p*-AV: *para-*Anisidine value

PUFAs: Poly unsaturated fatty acids

TBARS: Thiobarbituric acid reactive substance

THC: tetrahydrocannabinol

THCA: tetrahydrocannabinolic acid

THCV: Tetrahydrocannabivarin

UV-Vis : Ultra Violet Visible

α-T: Alpha-tocopherol
